# Supplementary material for: Radiation of members of the Soroserishookeriana complex (Asteraceae) on the Qinghai-Tibetan Plateau and their proposed taxonomic treatment
Source: PhytoKeys. 2018 Dec 20;(114):11–25. doi: 10.3897/phytokeys.114.29914 (PMC6308221; doi:10.3897/phytokeys.114.29914)
Supplement: Suppl. material 1 — The main morphological difference amongst members of the Soroserishookeriana complex and the closely related species [file phytokeys-114-011-s001.xls]

## Sheet: Character code
Character states
Stem diameter (cm)
Stem length (cm)
Length of inflorescenece (cm)
Diameter of inflorescence (cm)
Leaf length (cm)
Leaf width (cm)
Petiole length (cm)
Peduncle length (cm)
Lobe length (cm)
Lobe width (cm)
Leaf shape: elliptic 0, long elliptic 1, ovate 2, oblong-ovate 3, ovate-lanceolate 4, obovate 5, Obovate lanceolate 6, narrow strip 7, linear 8
Degree of division: no division 0, partly divided 1, slightly lobed 2, deeply lobed 3
Adaxial leaf: glabrous 0, sparse pilose 1, dense pilose 2
Involucre indumentum: glabrous 0, less pilose 1, few short hairs 2, pilose 3, dense pilose 4, dense long pilose 5
Shape of bract: no division 0, bended dentate 1, oblique triangle 2, narrow triangle 3, wide triangle 4, triangle 5, semicircular 6, polygon 7
Lobe diversity: no division 0, turn samll 1, turn large 2, unchanged 3, irregular 4
Pappus color: whitish 0, whitish but grayish apically
Density of lobes: no division, paucity 1, sparse 2, dense 3
Number of outer phyllaries: no small bracts 0, paucity 1, sparse 2， dense 3

## Sheet: morphological comparision
Voucher	Taxon (FOC, 2011)	Diameter of stem	Length of stem	Length of inforrence	Diameter of inforrence	Length of leaf	Width of leaf	Length of petiole	Length of pedicel	Length of lobe	Width of lobe	Shape of leaf	Degree of division	Abaxial side	Indumentum on bract	Shape of bract	Variance of lobe	Color of pappus	Density of lobes	Number of outer phyllaries
AR18	Soroseris glomerata	0.4	4.5	1.5	1.5	1.5	0.3	0	0.7	0	0	0	0	0	1	0	0	0	0	1
YD45	Soroseris teres	1	23.5	21	0.5	6	0.4	3.5	0	0	0	6	1	2	1	2	1	1	3	1
YD46	Soroseris erysimoides	0.33	17.2	2.15	2.6	3.85	0.7	0.3	0.9	0	0	1	0	1	0	0	0	0	0	1
CN30	Soroseris erysimoides	0.5	9.5	2.05	2.7	2.95	0.3	0.75	0.75	0	0	1	0	1	0	0	0	0	0	1
CN47	Soroseris erysimoides	0.3	8.5	2.3	3.3	4.5	0.8	0.5	0.8	0	0	1	0	1	0	0	0	0	0	1
CN48	Soroseris erysimoides	0.4	4	2.3	3	2.5	0.6	1	0.4	0	0	1	0	1	0	0	0	0	0	1
CN49	Soroseris erysimoides	0.35	4.5	1.8	3	3.2	0.4	0.8	0.4	0	0	1	0	1	0	0	0	0	0	1
CN50	Soroseris erysimoides	0.3	4.3	1.5	2	2.4	0.5	1	0.4	0	0	1	0	1	0	0	0	0	0	1
CN51	Soroseris erysimoides	0.375	9.34	2.04	2.74	3	0.6	1.1	0.66	0	0	1	0	1	0	0	0	0	1	1
LZ33	Soroseris hookeriana occidentalis	0.3	2.7	1.5	1.8	2	0.3	0	1.4	0.4	0.2	4	3	2	3	2	3	0	3	1
CN29	Soroseris hookeriana typica	0.35	9.6	2	3	5.3	0.5	2.7	0.5	0.3	0.1	4	3	2	4	5	3	0	3	1
CN32	Soroseris hookeriana typica	0.5	8.5	2.5	2.2	5	0.8	2.5	0.8	0.3	0.1	4	3	2	4	5	3	0	3	1
YD21	Soroseris hookeriana hirsuta	0.6	2.7	2.5	2	3.5	1.4	0	0.8	0.5	0.3	4	3	2	5	1	4	0	1	3
ZD2	Soroseris hookeriana gillii	0.5	3.5	3.5	6	5.5	0.77	1	0.8	0.4	0.4	3	3	2	0	6	4	0	3	2
DC9	Soroseris hookeriana gillii	0.5	3.5	4.3	7.8	6.5	0.4	3	0.7	0.3	0.7	3	3	2	0	7	4	0	3	2
KD11	Soroseris hookeriana gillii	0.4	3	4.2	5	2	0.4	0	0.9	0.1	0.1	3	3	2	0	7	4	0	3	2
CY39	Soroseris hookeriana gillii	0.6	4	2.5	5.2	1.8	1.5	0	0.7	0.1	0.1	3	2	2	0	6	3	0	1	2
CY53	Soroseris hookeriana gillii	0.5	3.5	3.6	6	3.84	0.768	1	0.78	0.26	0.34	3	2	2	0	6	3	0	1	2
KD54	Soroseris hookeriana gillii	0.5	3.5	3.5	6	5.2	0.77	1	0.8	0.4	0.4	3	3	2	0	7	2	0	3	2
AR20	Soroseris hookeriana handelii	0.5	3	1.5	2	1.7	0.1	0.4	0.7	0.1	0.1	7	3	0	1	5	3	0	3	1
LZ52	Soroseris hookeriana handelii	0.6	2.8	2.5	4.8	2	0.1	1	0.6	0.1	0.1	7	3	0	1	5	3	0	3	1
DX17	Soroseris hookeriana handelii	0.5	3	2.5	4.8	1.8	0.1	1	1	0.1	0.1	7	3	0	1	5	3	0	3	1
DX43	Soroseris hookeriana handelii	0.5	2.73	2.17	3.35	1.82	0.1	0.57	0.63	0.1	0.1	7	3	0	1	5	3	0	3	1
DR55	Soroseris hookeriana handelii	0.5	2.5	2	2.2	1.8	0.1	0.3	0.5	0.1	0.1	7	3	0	1	5	3	0	3	1
CN25	Soroseris hookeriana handelii	0.4	2.6	2.5	4.3	2.1	0.1	0.3	0.5	0.1	0.1	7	3	0	1	5	3	0	3	1
LZ27	Soroseris hookeriana handelii	0.5	2.5	2	2	1.8	0.1	0.4	0.5	0.1	0.1	7	3	0	1	5	3	0	3	1
XJ5	Intermidate B	0.6	11	3	2.8	9.6	1	2.5	1.8	0.6	0.6	3	3	2	0	4	3	0	3	1
XJ4	Intermidate B	0.6	11.3	3.7	5.5	7.8	0.6	1.5	1.2	0.4	0.4	3	3	2	0	4	3	0	3	1
XJ6	Intermidate B	0.6	11.1	2.5	4.8	5.8	0.5	2	0.4	0.4	0.5	3	3	2	0	4	3	0	3	1
XC10	Intermidate A	0.5	4	4.2	7.6	3.5	0.4	1.3	1.4	0.5	0.1	7	3	0	1	3	4	0	3	1
KD7	Intermidate A	0.4	4.5	4.3	7.3	4	0.3	1	1.1	0.3	0.1	7	3	0	1	3	4	0	3	1
CY40	S.sp.40	0.6	4.3	3.2	5.4	2.7	0.5	1.3	1	0	0	5	0	0	2	0	0	0	0	1
HS12	Syncalathium disciforme	0.3	1.8	2.1	3	2.1	0.4	0.7	0	0.1	0.1	8	3	0	0	0	0	0	0	0
LZ24	Syncalathium kawaguchii	0.3	2.6	2	3.9	4.7	0.87	2	0	0	0	2	0	0	0	0	0	0	0	0
